# Supplementary material for: Rab geranylgeranyl transferase β subunit is essential for male fertility and tip growth in Arabidopsis
Source: PubMed Central journal article supplement (PMC4265159; doi:10.1093/jxb/eru412), 2014-10-14
Supplement: supp_eru412_jexbot132753_file001.pdf [file supp_eru412_jexbot132753_file001.pdf]

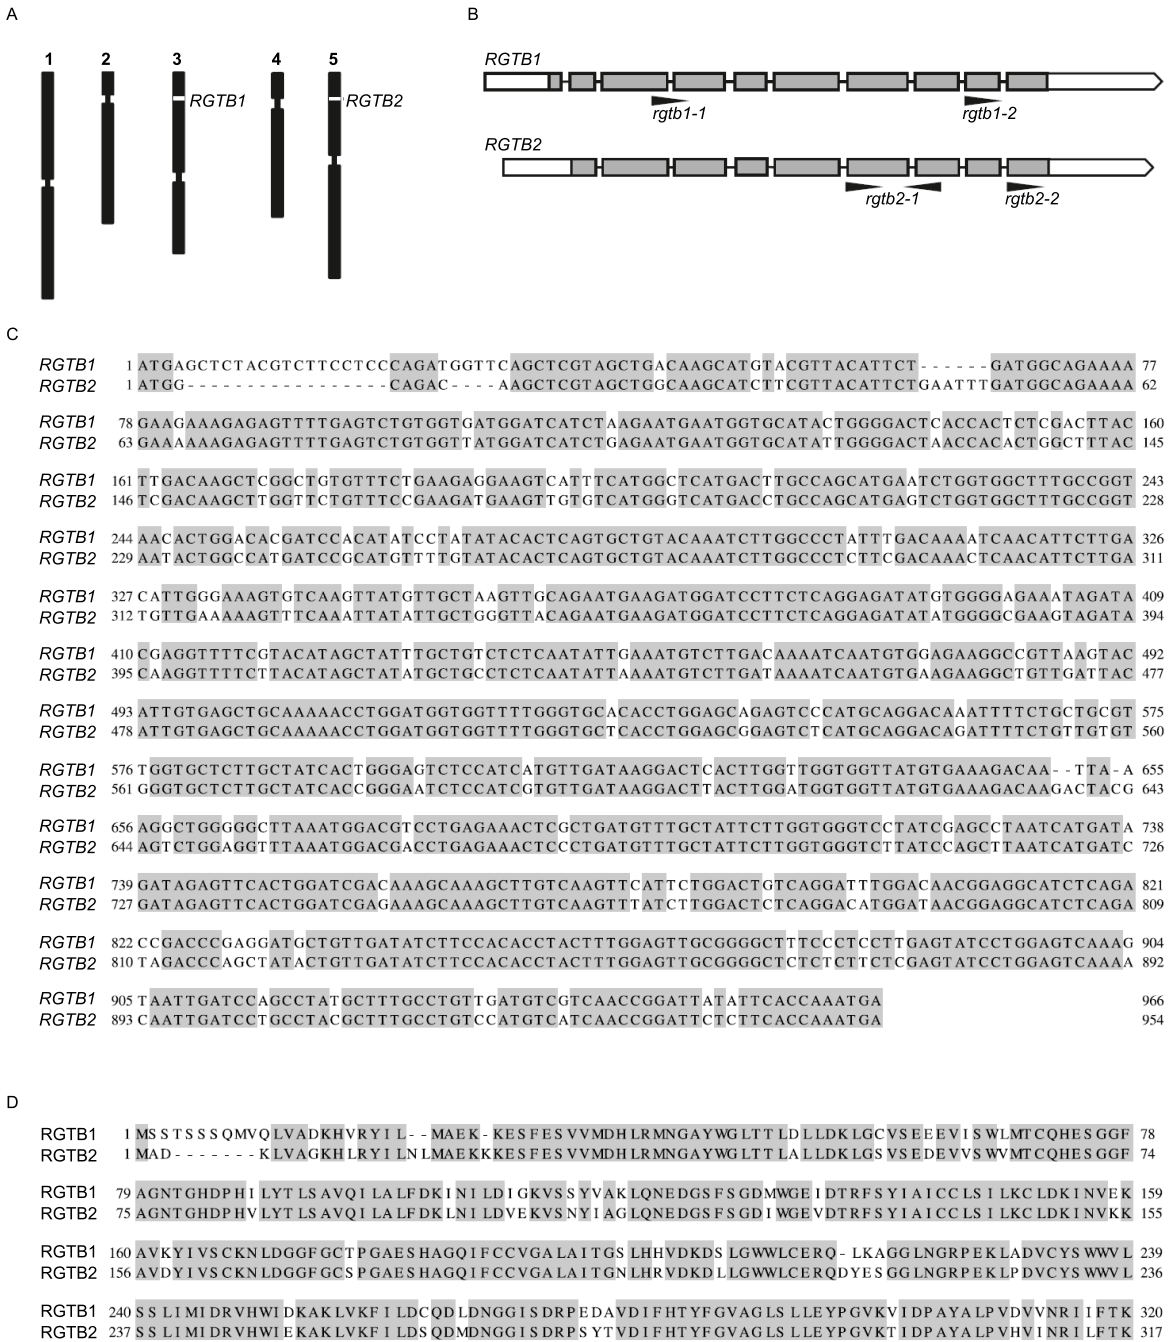

Comparison of AtRGTB subunits. A) chromosomal location of AtRGTB genes, B) gene structure and location of inserts in corresponding SALK lines, C) comparison of nucleotide and D) amino acid sequences of AtRGTB. Homology regions are shaded.

Amino acid and nucleotide sequence analysis and insert positioning

AtRGTB1 and AtRGTB2 nucleotide sequences, NM\_121259 and NM\_180236, respectively, were derived from the EMBL server. Corresponding amino acid sequences, NP\_568259 and NP\_850567, respectively, were derived from the PDB server. Alignments were performed with the T-coffee (<http://www.ebi.ac.uk/Tools/msa/tcoffee>) and visualized with Jalview. DNA obtained from genotyping PCR reaction of each mutant line was sequenced from the Lbb1.3 primer (<http://oligo.ibb.waw.pl>). Results of the sequencing were aligned with genomic sequence of the AtRGTB1 and AtRGTB2 genes with the EMBOSS program (<http://emboss.bioinformatics.nl>).

Fig. S2

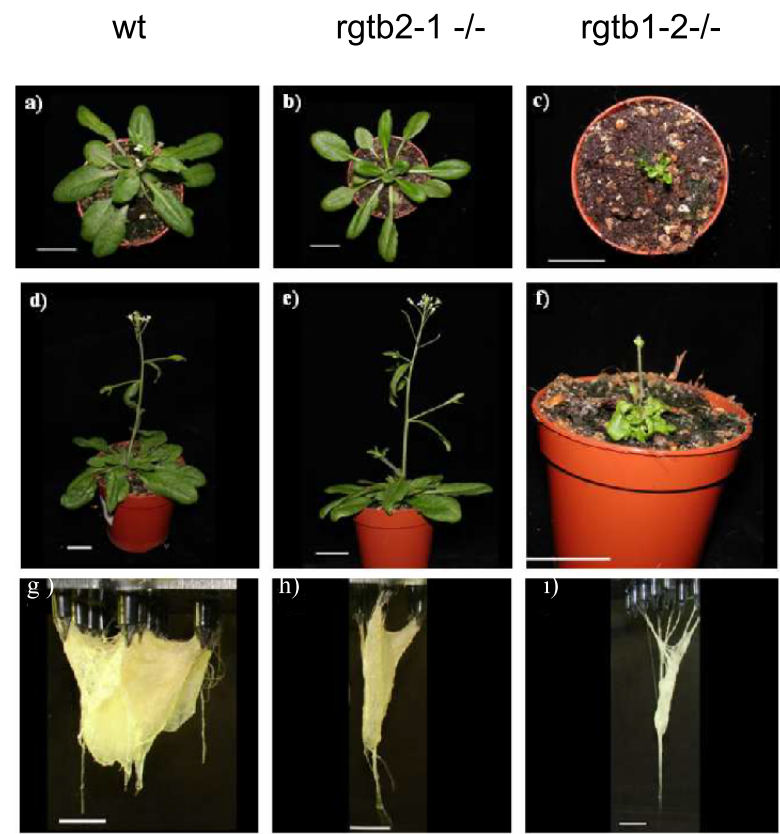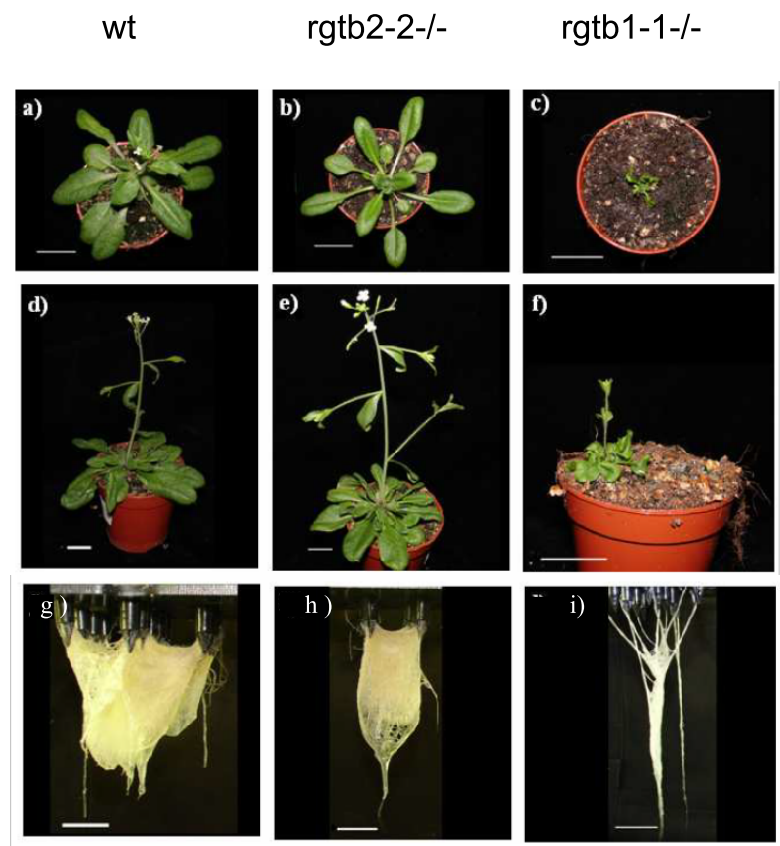

Fig. S2 Morphology of *rgtb* homozygous mutants. a-c) 4-week old rosette, d-f) 5-week old flowering stem, g-i) 5-week old root system grown in hydroponics.
